# Supplementary material for: The luminescence of ion-exchangeable defect pyrochlore KNbWO6·H2O:xEu3+
Source: Royal Society of Chemistry journal article supplement (doi:10.1039/c4ra02722a), 2014-01-01
Supplement: c4ra02722a1.pdf [file c4ra02722a1.pdf]

Electronic Supplementary Information

## The Luminescence of Ion-exchangeable Defect Pyrochlore $\text{KNbWO}_6 \cdot \text{H}_2\text{O} : x\text{Eu}^{3+}$

*Yong Nam Han,<sup>†</sup> Shihui Jiao, Man Xu, Yaohua Xu, Guangsheng Pang\* and Shouhua Feng*

State Key Laboratory of Inorganic Synthesis and Preparative Chemistry, College of Chemistry,  
Jilin University, Changchun 130012, P. R. China

The composition of the products is determined by EDX using a HITACHI  
SU8020 electron microscope equipped with Bruker spectrometer operating at 20 kV.

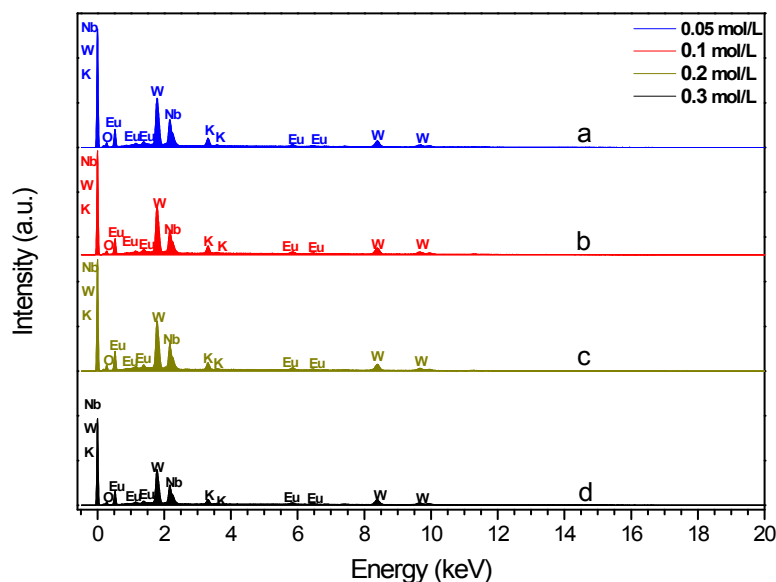

**Figure S1** EDX spectra of  $\text{KNbWO}_6 \cdot \text{H}_2\text{O} : x\text{Eu}^{3+}$  prepared in  $\text{Eu}(\text{NO}_3)_3$  solution of (a) 0.05 mol/L, (b) 0.1 mol/L, (c) 0.2 mol/L, and (d) 0.3 mol/L.









| Atom%<br>C <sub>Eu3+</sub> (mol/L) | Element     | O     | Nb    | W    | K    | Eu   |
|------------------------------------|-------------|-------|-------|------|------|------|
|                                    | <b>0.05</b> |       | 76.02 | 9.92 | 8.47 | 4.50 |
| <b>0.1</b>                         |             | 74.09 | 9.93  | 9.87 | 4.81 | 1.30 |
| <b>0.2</b>                         |             | 76.12 | 9.40  | 9.16 | 3.94 | 1.38 |
| <b>0.3</b>                         |             | 73.65 | 10.88 | 9.78 | 3.84 | 1.84 |

The x value of  $\text{KNbWO}_6 \cdot \text{H}_2\text{O} : x\text{Eu}^{3+}$  is determined by normalized of the Eu component to the average value of Nb and W components in the product. For example, The x value of  $\text{KNbWO}_6 \cdot \text{H}_2\text{O} : x\text{Eu}^{3+}$  prepared in 0.1 mol/L  $\text{Eu}(\text{NO}_3)_3$  solution is determined as  $1.30 / (9.93/2 + 9.87/2) = 0.131$ . So, the x value of  $\text{KNbWO}_6 \cdot \text{H}_2\text{O} : x\text{Eu}^{3+}$  prepared in  $\text{Eu}(\text{NO}_3)_3$  solution of 0.05, 0.1, 0.2, and 0.3 mol/L are determined as 0.120, 0.131, 0.149, and 0.178, respectively.

$\text{KNbWO}_6 \cdot \text{H}_2\text{O} : x\text{Eu}$  is difficult to be dissolved. But we find that  $\text{Eu}^{3+}$  in  $\text{KNbWO}_6 \cdot \text{H}_2\text{O} : x\text{Eu}$  can be exchanged in concentrated nitric acid under hydrothermal conditions.  $\text{Eu}^{3+}$  in  $\text{KNbWO}_6 \cdot \text{H}_2\text{O} : x\text{Eu}$  can be determined by ICP after treating the

samples in concentrated nitric acid under hydrothermal conditions. The details are as follow:

50.00 mg  $\text{KNbWO}_6 \cdot \text{H}_2\text{O} : x\text{Eu}$  is treated in 30mL 3M  $\text{HNO}_3$  at 180 °C for 24h under hydrothermal condition. This process is repeated 4 times to make sure that  $\text{Eu}^{3+}$  can be completely removed from  $\text{KNbWO}_6 \cdot \text{H}_2\text{O} : x\text{Eu}$ . The solution is collected for ICP measurement. According to the ICP result, the doping composition of  $\text{Eu}^{3+}$  are 0.115, 0.127, 0.143, 0.170 for the products obtained in  $\text{Eu}(\text{NO}_3)_3$  solution of 0.05, 0.1, 0.2, and 0.3 mol/L, respectively. This result is consistent with that of EDX. The deviation (less than 5%) between the results of EDX and ICP probably due to that  $\text{Eu}^{3+}$  cannot be completely removed from  $\text{KNbWO}_6 \cdot \text{H}_2\text{O} : x\text{Eu}$ . The EDX result indicates that there is still ca. 1%  $\text{Eu}^{3+}$  residual after four time hydrothermal treatments.
